# Supplementary material for: The gold content of mafic to felsic potassic magmas
Source: PubMed Central journal article supplement (PMC11324659; doi:10.1038/s41467-024-51405-7), 2024-08-14
Supplement: 41467_2024_51405_MOESM1_ESM.pdf [file 41467_2024_51405_MOESM1_ESM.pdf]

1

2 **The gold content of mafic to felsic potassic magmas**

3

4 **Jia Chang<sup>1,\*</sup>, Andreas Audétat<sup>1</sup>, Thomas Pettke<sup>2</sup>**

5 <sup>1</sup>Bavarian Geoinstitute, University of Bayreuth, Bayreuth 95440, Germany

6 <sup>2</sup>Institute of Geological Sciences, University of Bern, Bern 3012, Switzerland

7

\*Email: [Jia.Chang@uni-bayreuth.de](mailto:Jia.Chang@uni-bayreuth.de)

8

9

This file contains three Supplementary Figures:

10

**Supplementary Fig. 1**

11

**Supplementary Fig. 2**

12

**Supplementary Fig. 3**

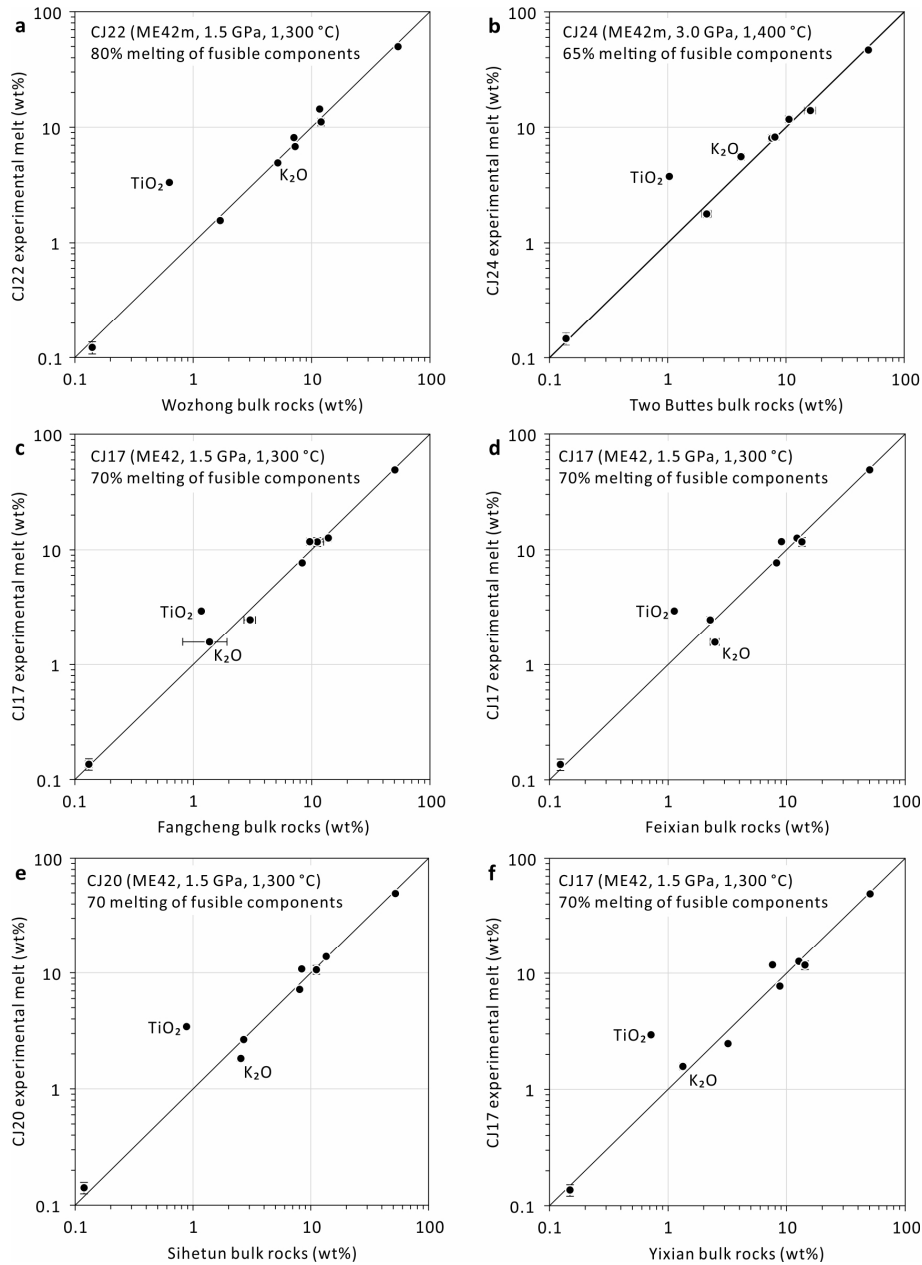

13

14 **Supplementary Fig. 1 Major element oxide contents of natural high-Mg potassic mafic**

15 **rocks, compared to those of experimentally produced partial melts. (a) Wozhong bulk rocks vs.**

16 **CJ22 experimental melt, (b) Two Buttes vs. CJ24, (c) Fangcheng vs. CJ17, (d) Feixian vs. CJ17, (e)**

17 **Sihetun vs. CJ20, (f) Yixian vs. CJ17. Note the generally good match of most elements, except for**

18 **TiO<sub>2</sub>. The latter is due to extraordinarily high TiO<sub>2</sub> contents of the amphibole and phlogopite in the**

19 **starting materials of this study. See Supplementary Fig. 2 for the definition of fusible components.**

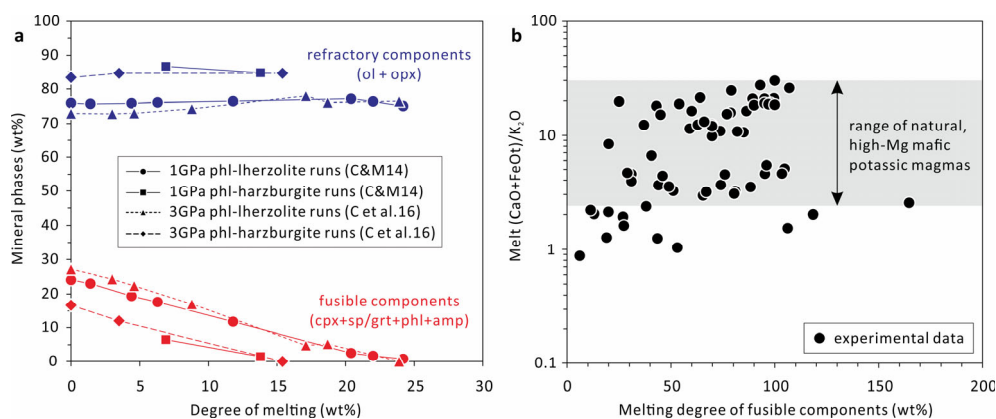

20

21 **Supplementary Fig. 2 Experimental constraints on the degree of partial melting of meta-**22 **somatic mantle components.** (a) The degree of partial melting of phl ± amp-bearing peridotites vs.

23 the abundances of fusible and refractory mantle components. All the data are taken from previous

24 experimental studies<sup>1,2</sup>. Note that the total abundance of refractory components remains relatively

25 constant, though the ol/opx ratio increases significantly (not shown) to buffer the composition of

26 the partial melts. (b) Experimentally constrained melting degrees of fusible components vs. the

27 (CaO+FeOt)/K<sub>2</sub>O ratio of the silicate melts. The dataset includes all partial melting experiments on

28 natural mantle phl- and/or amp-bearing peridotites and pure metasomatic veins that are available to

29 date<sup>1-3</sup>. Melting degrees >100% indicate that not only the fusible components were melted, but also30 part of the refractory components. The range of (CaO+FeOt)/K<sub>2</sub>O ratios in natural magmas is based31 on a global dataset<sup>4,5, this study</sup>. The lack of compositional overlap between experimental and natural

32 melt compositions at very low and very high melting degrees suggest that the natural alkaline mag-

33 mas formed at melting degrees in the range of ~20–100%. Abbreviations: amp, amphibole; cpx,

34 clinopyroxene; grt, garnet; ol, olivine; opx, orthopyroxene; phl, phlogopite; sp, spinel.

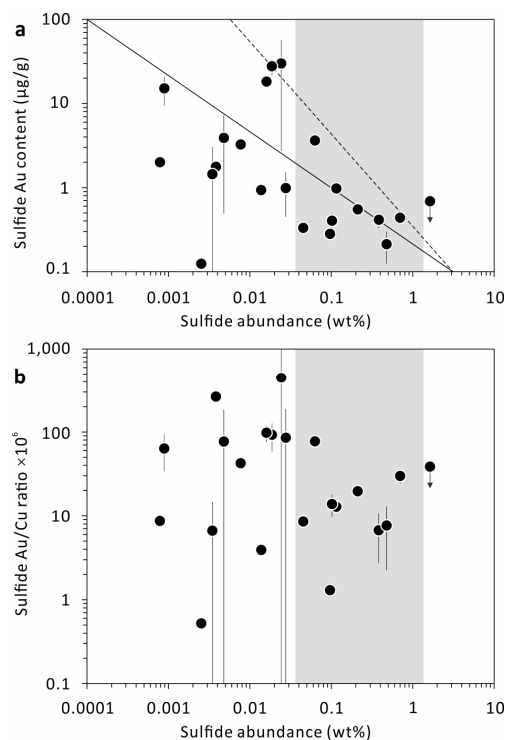

35

36 **Supplementary Fig. 3 Measured Au content and Au/Cu ratio of sulfides vs. observed sul-**  
37 **fide abundance in mantle metasomatic veins.** The grey shaded areas reflect the range in sulfide  
38 abundances expected to have been present in the metasomatic veins that produced the mafic potassic  
39 magmas investigated in this study, calculated based on the S content of the mafic potassic magmas  
40 (0.07–0.42 wt% S), a sulfide S content of 36.5 wt%, and melting degrees of 20–100% in the meta-  
41 somatic veins (note that the sulfides were exhausted during the partial melting). In panel (a), the  
42 solid line stands for moderate sulfide Au contents as a function of sulfide abundances, whereas the  
43 dash line stands for very high sulfide Au contents. Based on the sulfide abundances and sulfide Au  
44 contents covered by the grey area, the Au contents in the primitive potassic melts were then calcu-  
45 lated using the same range of melting degrees as above, returning 1.2–6.6 ng/g for the case of mod-  
46 erate sulfide Au contents, and 3.5–25 ng/g for the case of very high sulfide Au contents. The melts  
47 would contain 20–25 ng/g only in the most extreme, probably unrealistic, scenario of a metasomatic  
48 vein that contains the very Au-rich sulfides and undergoes only 20% melting. The Au/Cu ratios of

49 the primitive potassic melts should be the same as that of the mantle sulfides as shown in panel (b),  
50 because the sulfides are completely dissolved upon partial mantle melting.

51

## 52 **References**

- 53 1. Condamine, P. & Médard, E. Experimental melting of phlogopite-bearing mantle at 1 GPa: Im-  
54 plications for potassic magmatism. *Earth Planet. Sci. Lett.* **397**, 80–92 (2014).
- 55 2. Condamine, P., Médard, E. & Devidal, J. L. Experimental melting of phlogopite-peridotite in the  
56 garnet stability field. *Contrib. Min. Petrol.* **171**, 95 (2016).
- 57 3. Lloyd, F. E., Arima, M. & Edgar, A. D. Partial melting of a phlogopite-clinopyroxenite nodule  
58 from south-west Uganda: an experimental study bearing on the origin of highly potassic conti-  
59 nental rift volcanics. *Contrib. Min. Petrol.* **91**, 321–329 (1985).
- 60 4. Pilet, S., Baker, M. B. & Stolper, E. M. Metasomatized lithosphere and the origin of alkaline  
61 lavas. *Science* **320**, 916–919 (2008).
- 62 5. Schmidt, M. W. & Jagoutz, O. The global systematics of primitive arc melts. *G-Cubed* **18**, 2817–  
63 2854 (2017).
